# Supplementary material for: Genetic Risks to Nicotine Dependence Predict Negative Mood and Affect in Current Non-Smokers
Source: PubMed Central journal article supplement (PMC4894432; doi:10.1038/srep09521), 2015-03-31
Supplement: srep09521-s1.pdf [file srep09521-s1.pdf]

# **Genetic Risks to Nicotine Dependence Predict Negative Mood and Affect in Current Non-Smokers**

*Xiangning Chen,<sup>1,2</sup> Steven H Aggen,<sup>1</sup> Jingchun Chen<sup>1</sup> , Lingxi Li,<sup>1</sup> Kenneth S Kendler<sup>1,2</sup>,  
Melissa Blank,<sup>3</sup> and Thomas Eissenberg<sup>4</sup>*

*1: Virginia Institute for Psychiatric and Behavioral Genetics, Virginia Commonwealth University;*

*2: Department of Human and Molecular Genetics, Virginia Commonwealth University;*

*3: Department of Psychology, West Virginia University*

*4: Department of Psychology and Center for the Study of Tobacco Products, Virginia Commonwealth University*

Supplementary Information

**Table S1. Exploratory factor analyses of the POMS**

|      | model         | # factors | RMSR        | RMSEA        | TLI          | $\chi^2$ P      |
|------|---------------|-----------|-------------|--------------|--------------|-----------------|
| 0 mg | POMS_1        | 3         | 0.04        | 0.078        | 0.891        | 6.60E-19        |
|      | POMS_2        | 4         | 0.03        | 0.057        | 0.945        | 1.00E-06        |
|      | <b>POMS_3</b> | <b>5</b>  | <b>0.03</b> | <b>0.045</b> | <b>0.968</b> | <b>0.0028</b>   |
|      | POMS_4        | 6         | 0.02        | 0.039        | 0.977        | 0.0280          |
| 2 mg | POMS_1        | 3         | 0.04        | 0.087        | 0.865        | 6.80E-27        |
|      | POMS_2        | 4         | 0.04        | 0.071        | 0.913        | 5.50E-13        |
|      | <b>POMS_3</b> | <b>5</b>  | <b>0.03</b> | <b>0.058</b> | <b>0.943</b> | <b>1.50E-06</b> |
|      | POMS_4        | 6         | 0.02        | 0.042        | 0.973        | 0.012           |
| 4 mg | POMS_1        | 3         | 0.04        | 0.096        | 0.855        | 1.90E-35        |
|      | POMS_2        | 4         | 0.03        | 0.068        | 0.931        | 3.40E-11        |
|      | <b>POMS_3</b> | <b>5</b>  | <b>0.03</b> | <b>0.059</b> | <b>0.948</b> | <b>8.20E-07</b> |
|      | POMS_4        | 6         | 0.02        | 0.048        | 0.969        | 0.0018          |

RMSR: root mean square of the residuals

RMSEA: root mean square error of approximation

TLI: Tucker-Lewis index

The models highlighted by bold fonts were selected for subsequent confirmatory analyses and MI testing.



**Table S3. Exploratory factor analyses of the PANAS**

|      | model          | # factors | RMSR        | RMSEA        | TLI          | $\chi^2$ P      |
|------|----------------|-----------|-------------|--------------|--------------|-----------------|
| 0 mg | PANAS_1        | 2         | 0.05        | 0.107        | 0.847        | 6.50E-20        |
|      | <b>PANAS_2</b> | <b>3</b>  | <b>0.04</b> | <b>0.075</b> | <b>0.927</b> | <b>1.40E-06</b> |
|      | PANAS_3        | 4         | 0.03        | 0.066        | 0.943        | 0.00029         |
| 2 mg | PANAS_1        | 2         | 0.05        | 0.099        | 0.883        | 3.10E-16        |
|      | <b>PANAS_2</b> | <b>3</b>  | <b>0.03</b> | <b>0.058</b> | <b>0.961</b> | <b>1.20E-03</b> |
|      | PANAS_3        | 4         | 0.02        | 0.044        | 0.980        | 5.60E-02        |
| 4 mg | PANAS_1        | 2         | 0.06        | 0.127        | 0.821        | 6.90E-31        |
|      | <b>PANAS_2</b> | <b>3</b>  | <b>0.03</b> | <b>0.075</b> | <b>0.938</b> | <b>1.10E-06</b> |
|      | PANAS_3        | 4         | 0.02        | 0.048        | 0.976        | 2.80E-02        |

**Table S4. Factor loadings of the PANAS**

| Item                  | 0 mg gum    |             |             |      |      | 2 mg gum    |             |             |      |       | 4 mg gum    |             |             |      |      |
|-----------------------|-------------|-------------|-------------|------|------|-------------|-------------|-------------|------|-------|-------------|-------------|-------------|------|------|
|                       | Inspired    | Nervous     | Attentive   | h2   | u2   | Inspired    | Nervous     | Attentive   | h2   | u2    | Inspired    | Nervous     | Attentive   | h2   | u2   |
| interested            | <b>0.64</b> | -0.09       | <b>0.26</b> | 0.48 | 0.52 | <b>0.68</b> | -0.12       | <b>0.31</b> | 0.57 | 0.427 | <b>0.62</b> | -0.19       | <b>0.40</b> | 0.57 | 0.43 |
| distressed            | 0.00        | <b>0.63</b> | -0.09       | 0.40 | 0.60 | -0.04       | <b>0.61</b> | -0.06       | 0.38 | 0.617 | -0.03       | <b>0.63</b> | -0.04       | 0.4  | 0.6  |
| excited               | <b>0.81</b> | 0.12        | 0.04        | 0.68 | 0.32 | <b>0.79</b> | 0.03        | 0.14        | 0.65 | 0.351 | <b>0.75</b> | -0.06       | 0.19        | 0.59 | 0.41 |
| strong                | <b>0.71</b> | -0.07       | 0.20        | 0.55 | 0.45 | <b>0.78</b> | -0.05       | 0.10        | 0.62 | 0.382 | <b>0.75</b> | -0.15       | 0.18        | 0.62 | 0.38 |
| enthusiastic          | <b>0.79</b> | -0.08       | 0.17        | 0.66 | 0.34 | <b>0.87</b> | -0.12       | 0.18        | 0.8  | 0.201 | <b>0.80</b> | -0.13       | 0.29        | 0.74 | 0.26 |
| proud                 | <b>0.73</b> | -0.11       | 0.07        | 0.55 | 0.45 | <b>0.79</b> | 0.02        | 0.03        | 0.62 | 0.375 | <b>0.79</b> | -0.08       | 0.04        | 0.63 | 0.37 |
| irritable             | -0.05       | <b>0.54</b> | -0.17       | 0.32 | 0.68 | -0.03       | <b>0.57</b> | -0.09       | 0.33 | 0.668 | -0.11       | <b>0.60</b> | -0.23       | 0.42 | 0.58 |
| alert                 | 0.47        | -0.14       | <b>0.63</b> | 0.63 | 0.37 | <b>0.59</b> | -0.02       | <b>0.60</b> | 0.71 | 0.286 | <b>0.46</b> | -0.06       | <b>0.78</b> | 0.82 | 0.18 |
| inspired              | <b>0.86</b> | 0.01        | 0.13        | 0.75 | 0.25 | <b>0.85</b> | -0.05       | 0.13        | 0.74 | 0.264 | <b>0.85</b> | -0.09       | 0.16        | 0.75 | 0.25 |
| nervous               | -0.05       | <b>0.74</b> | 0.05        | 0.55 | 0.45 | -0.04       | <b>0.75</b> | 0.11        | 0.57 | 0.426 | -0.03       | <b>0.82</b> | -0.03       | 0.67 | 0.33 |
| determined            | <b>0.78</b> | 0.04        | 0.26        | 0.68 | 0.33 | <b>0.8</b>  | 0.05        | 0.23        | 0.69 | 0.312 | <b>0.81</b> | 0.01        | 0.23        | 0.71 | 0.29 |
| attentive             | 0.47        | -0.10       | <b>0.84</b> | 0.93 | 0.07 | <b>0.47</b> | -0.13       | <b>0.82</b> | 0.91 | 0.092 | <b>0.47</b> | -0.17       | <b>0.78</b> | 0.86 | 0.14 |
| jittery               | 0.01        | <b>0.57</b> | -0.06       | 0.33 | 0.67 | 0.09        | <b>0.57</b> | -0.03       | 0.33 | 0.672 | -0.09       | <b>0.67</b> | 0.05        | 0.46 | 0.54 |
| active                | <b>0.74</b> | 0.02        | <b>0.20</b> | 0.59 | 0.41 | <b>0.74</b> | 0.08        | <b>0.22</b> | 0.6  | 0.397 | <b>0.67</b> | 0.04        | <b>0.38</b> | 0.59 | 0.41 |
| afraid                | -0.01       | <b>0.59</b> | 0.07        | 0.35 | 0.65 | -0.02       | <b>0.65</b> | -0.01       | 0.42 | 0.581 | -0.04       | <b>0.66</b> | -0.04       | 0.44 | 0.56 |
| SS Loadings           | 5.07        | 1.97        | 1.4         |      |      | 5.56        | 2.06        | 1.33        |      |       | 5.04        | 2.43        | 1.81        |      |      |
| Proportion Variance   | 0.34        | 0.13        | 0.09        |      |      | 0.37        | 0.14        | 0.09        |      |       | 0.34        | 0.16        | 0.12        |      |      |
| Cumulative Variance   | 0.34        | 0.47        | 0.56        |      |      | 0.37        | 0.51        | 0.6         |      |       | 0.34        | 0.5         | 0.62        |      |      |
| Proportion Explained  | 0.6         | 0.23        | 0.17        |      |      | 0.62        | 0.23        | 0.15        |      |       | 0.54        | 0.26        | 0.2         |      |      |
| Cumulative Proportion | 0.6         | 0.83        | 1           |      |      | 0.62        | 0.85        | 1           |      |       | 0.54        | 0.8         | 1           |      |      |

**Table S5. Exploratory factor analyses of the DEN**

|      | <b>model</b> | <b># factors</b> | <b>RMSR</b> | <b>RMSEA</b> | <b>TLI</b>   | <b>BIC</b>    | <b><math>\chi^2</math> P</b> |
|------|--------------|------------------|-------------|--------------|--------------|---------------|------------------------------|
| 0 mg | DEN_1        | 1                | 0.06        | 0.122        | 0.873        | -46.99        | 1.90E-14                     |
|      | <b>DEN_2</b> | <b>2</b>         | <b>0.03</b> | <b>0.066</b> | <b>0.964</b> | <b>-90.90</b> | <b>5.80E-03</b>              |
|      | DEN_3        | 3                | 0.02        | 0.036        | 0.990        | -73.80        | 0.2200                       |
| 2 mg | DEN_1        | 1                | 0.08        | 0.171        | 0.755        | 52.74         | 2.70E-32                     |
|      | <b>DEN_2</b> | <b>2</b>         | <b>0.03</b> | <b>0.065</b> | <b>0.965</b> | <b>-90.99</b> | <b>5.90E-03</b>              |
|      | DEN_3        | 3                | 0.03        | 0.050        | 0.98         | -69.47        | 8.80E-02                     |
| 4 mg | DEN_1        | 1                | 0.09        | 0.195        | 0.679        | 116.50        | 1.90E-44                     |
|      | <b>DEN_2</b> | <b>2</b>         | <b>0.04</b> | <b>0.075</b> | <b>0.953</b> | <b>-83.80</b> | <b>7.90E-04</b>              |
|      | DEN_3        | 3                | 0.04        | 0.090        | 0.932        | -49.09        | 2.20E-04                     |

BIC: Bayesian information criterion

**Table S6. Factor loadings of the DEN**

| Item                  | 0 mg gum    |             |      |      | 2 mg gum    |             |      |      | 4 mg gum    |             |      |      |
|-----------------------|-------------|-------------|------|------|-------------|-------------|------|------|-------------|-------------|------|------|
|                       | Confused    | Dizzy       | h2   | u2   | Confused    | Dizzy       | h2   | u2   | Confused    | Dizzy       | h2   | u2   |
| Nauseous              | <b>0.59</b> | 0.56        | 0.66 | 0.34 | <b>0.60</b> | 0.28        | 0.44 | 0.56 | <b>0.62</b> | 0.32        | 0.48 | 0.52 |
| Dizzy                 | 0.34        | <b>0.83</b> | 0.79 | 0.21 | 0.26        | <b>0.89</b> | 0.85 | 0.15 | 0.32        | <b>0.88</b> | 0.88 | 0.12 |
| Light Headed          | 0.26        | <b>0.82</b> | 0.74 | 0.26 | 0.31        | <b>0.87</b> | 0.85 | 0.15 | 0.23        | <b>0.94</b> | 0.93 | 0.07 |
| Nervous               | <b>0.70</b> | 0.41        | 0.66 | 0.34 | <b>0.76</b> | 0.30        | 0.66 | 0.34 | <b>0.70</b> | 0.24        | 0.55 | 0.45 |
| Sweaty                | <b>0.64</b> | 0.14        | 0.43 | 0.57 | <b>0.69</b> | 0.10        | 0.49 | 0.51 | <b>0.65</b> | 0.10        | 0.44 | 0.57 |
| Headache              | <b>0.54</b> | 0.33        | 0.39 | 0.61 | <b>0.58</b> | 0.27        | 0.41 | 0.59 | <b>0.54</b> | 0.35        | 0.42 | 0.58 |
| Salivation            | <b>0.35</b> | 0.24        | 0.18 | 0.82 | <b>0.44</b> | 0.23        | 0.25 | 0.75 | <b>0.51</b> | 0.16        | 0.28 | 0.72 |
| Heart Pound           | <b>0.57</b> | 0.50        | 0.58 | 0.42 | <b>0.67</b> | 0.37        | 0.59 | 0.41 | <b>0.59</b> | 0.34        | 0.46 | 0.54 |
| Confused              | <b>0.78</b> | 0.30        | 0.69 | 0.31 | <b>0.78</b> | 0.29        | 0.70 | 0.30 | <b>0.76</b> | 0.29        | 0.66 | 0.34 |
| Weak                  | <b>0.55</b> | <b>0.45</b> | 0.51 | 0.49 | <b>0.52</b> | <b>0.47</b> | 0.49 | 0.51 | <b>0.55</b> | <b>0.48</b> | 0.53 | 0.47 |
| SS Loadings           | 3.07        | 2.57        |      |      | 3.44        | 2.29        |      |      | 3.23        | 2.40        |      |      |
| Proportion Variance   | 0.31        | 0.26        |      |      | 0.34        | 0.23        |      |      | 0.32        | 0.24        |      |      |
| Cumulative Variance   | 0.31        | 0.56        |      |      | 0.34        | 0.57        |      |      | 0.32        | 0.56        |      |      |
| Proportion Explained  | 0.54        | 0.46        |      |      | 0.60        | 0.40        |      |      | 0.57        | 0.43        |      |      |
| Cumulative Proportion | 0.54        | 1.00        |      |      | 0.60        | 1.00        |      |      | 0.57        | 1.00        |      |      |
| RMSR                  |             |             |      | 0.03 |             |             |      | 0.03 |             |             |      | 0.04 |
